# Supplementary material for: Alterations in the uterine microbiome drive the progression of endometriosis via neutrophil-mediated AKT-mTOR signaling pathway.
Source: Research Square preprint supplement (doi:10.21203/rs.3.rs-8183082/v1), 2025-12-11
Supplement: Supplementary file 1 [file bc6da4d1dca9beeb5b873064.docx]

**Supplementary Figures**


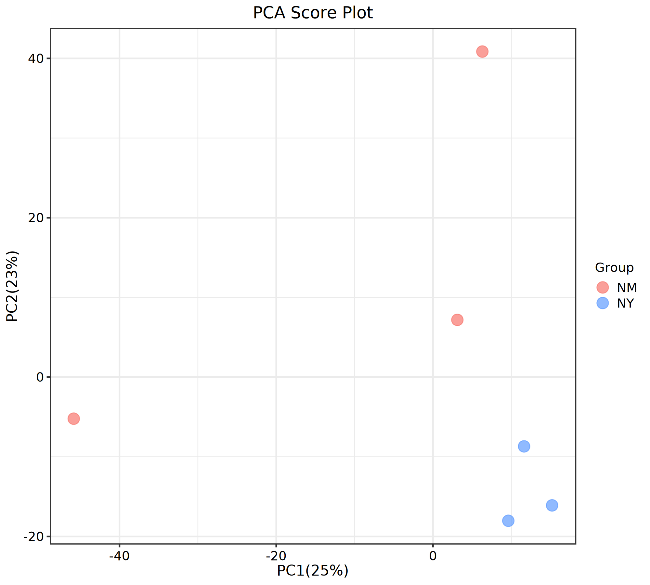


**Supplementary.Figure.1** PCA analysis of the EC (blue) and NC (orange) groups in 16s rRNA-seq.


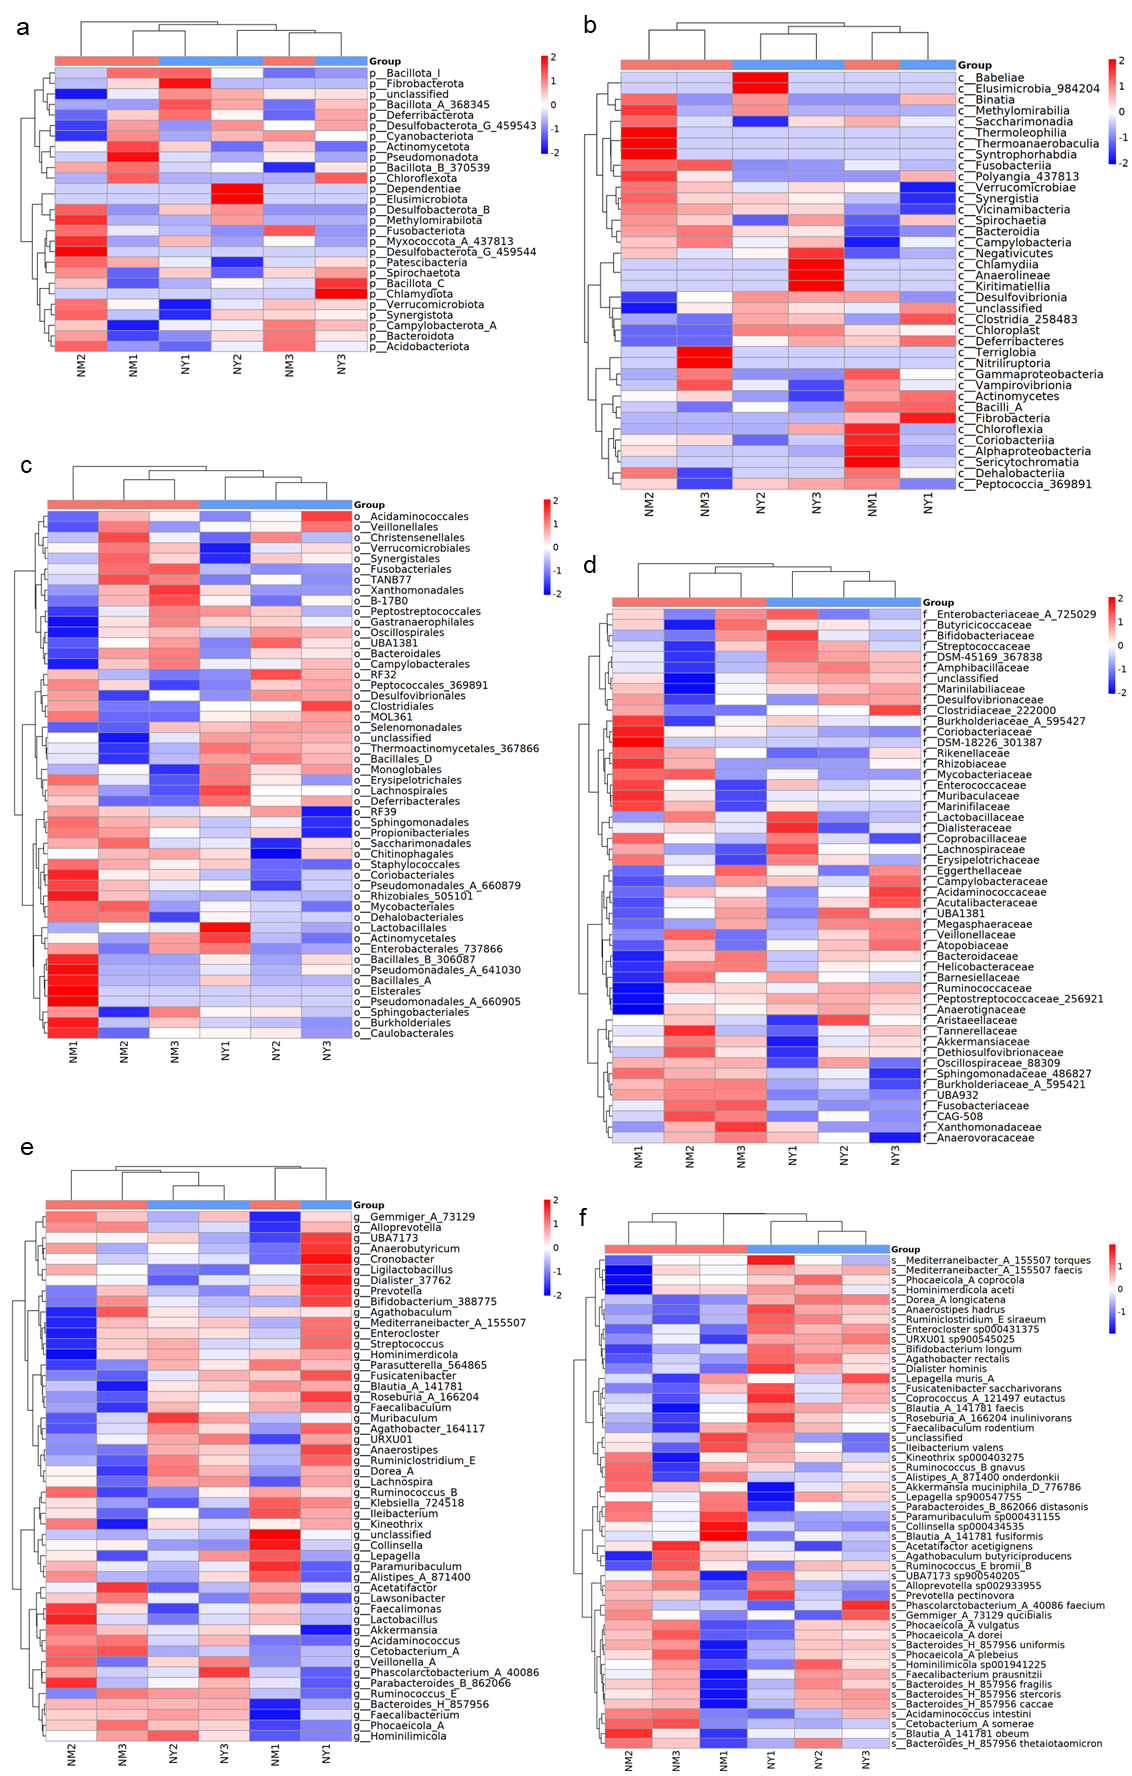


**Supplementary.Figure.2** a-f) Heatmaps displaying the expression levels of Phylum (a), Class (b), Order (c), Family (d), Genus (e) and Species (f) of the EC (blue) and NC (orange) groups in 16s rRNA-seq.


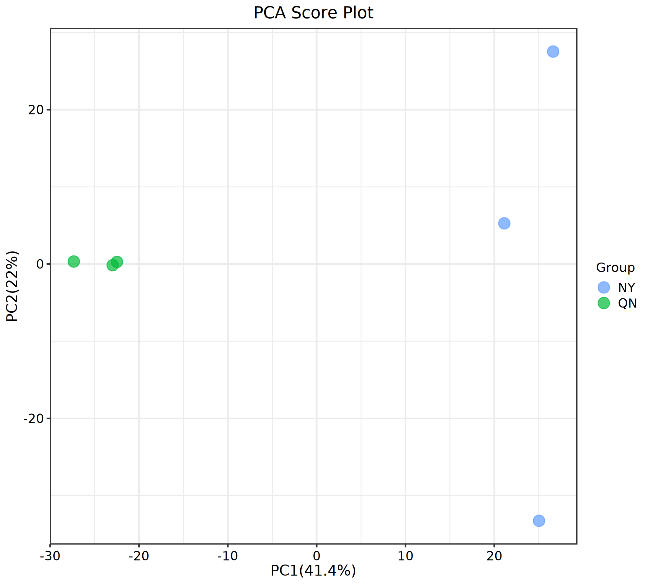


**Supplementary.Figure.3** PCA analysis of the EC (blue) and NCF (green) groups in 16s rRNA-seq.


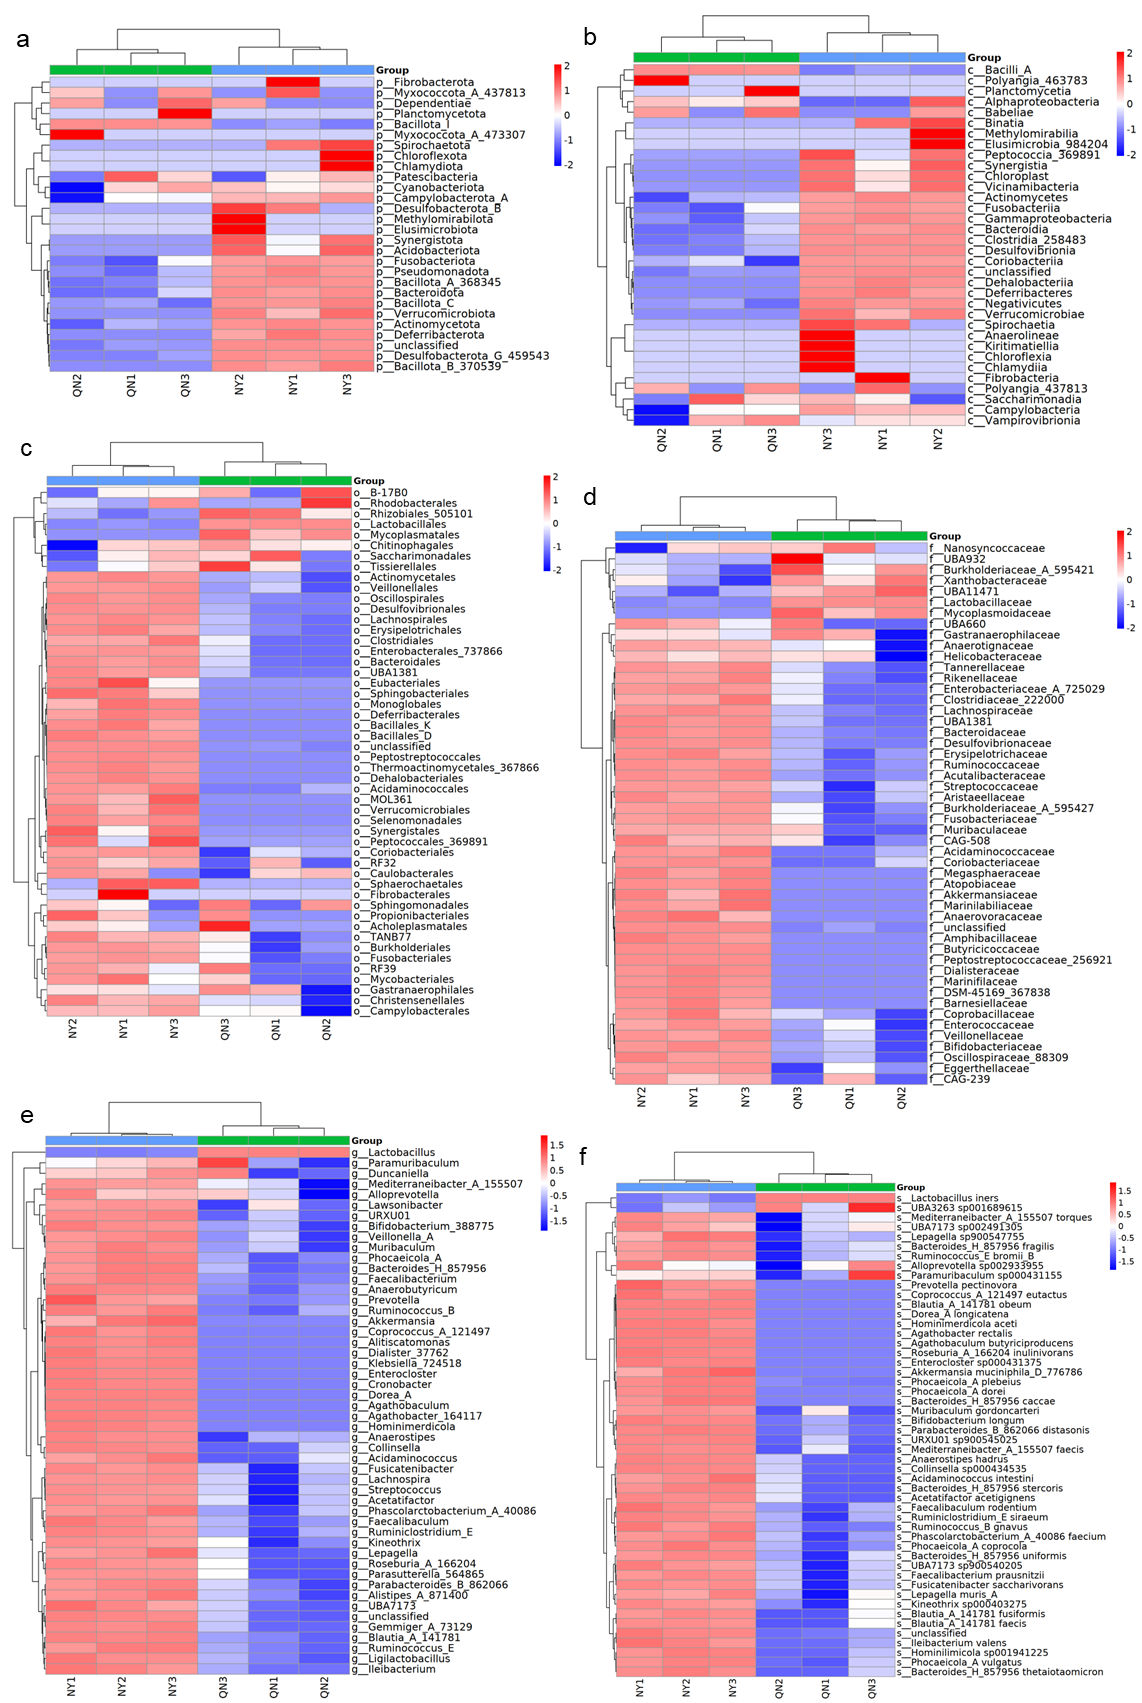


**Supplementary.Figure.4** a-f) Heatmaps displaying the expression levels of Phylum (a), Class (b), Order (c), Family (d), Genus (e) and Species (f) of the EC (blue) and NCF (green) groups in 16s rRNA-seq.


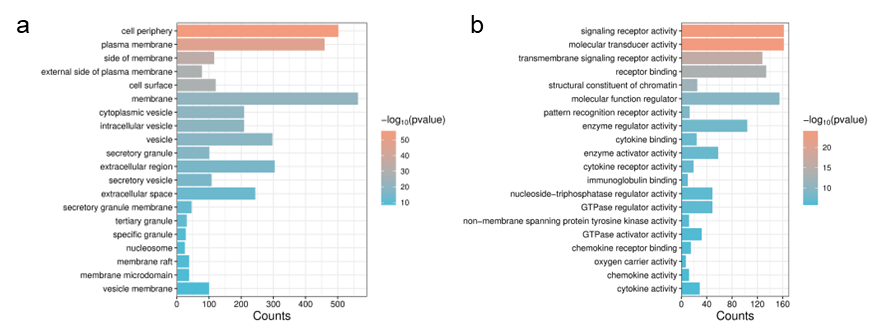


**Supplementary.Figure.5** a-b) GO Cellular Component (CC) (a) and GO Molecular Function (MF) (b) enrichment analysis of the EC relative to the NC group.


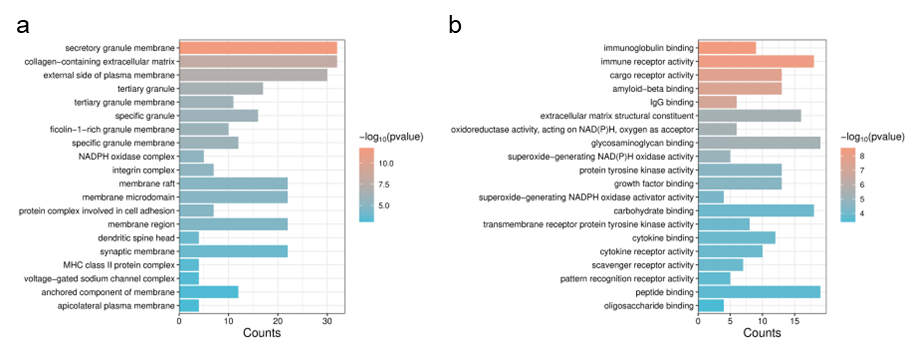


**Supplementary.Figure.6** a-b) GO Cellular Component (CC) (a) and GO Molecular Function (MF) (b) enrichment analysis of the EC relative to the NC group in the GEO database.


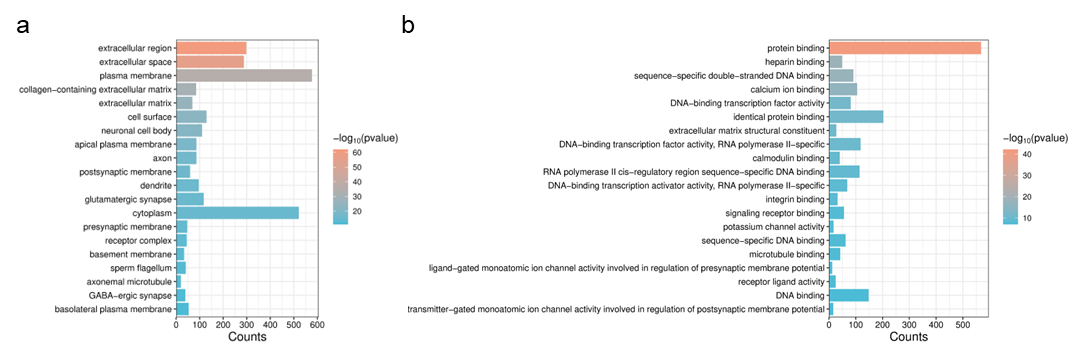


**Supplementary.Figure.7** a-b) GO Cellular Component (CC) (a) and GO Molecular Function (MF) (b) enrichment analysis of the EE relative to the EC group.


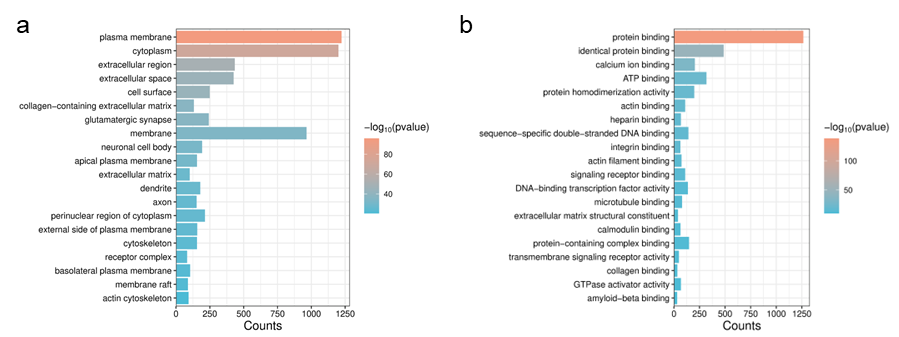


**Supplementary.Figure.8** a-b) GO Cellular Component (CC) (a) and GO Molecular Function (MF) (b) enrichment analysis of the EE relative to the NC group.


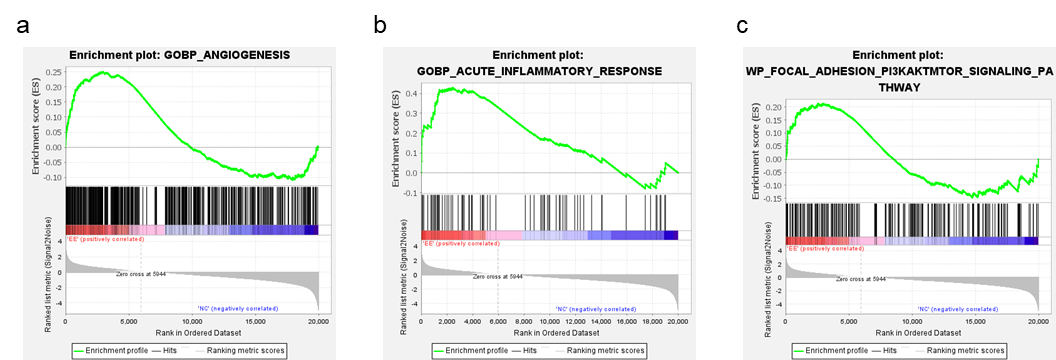


**Supplementary.Figure.9** a-c) GSEA enrichment analysis of angiogenesis (a), acute inflammatory response (b) and adhesion PI3K-AKT-mTOR signaling pathway (c) between the EE and NC groups.


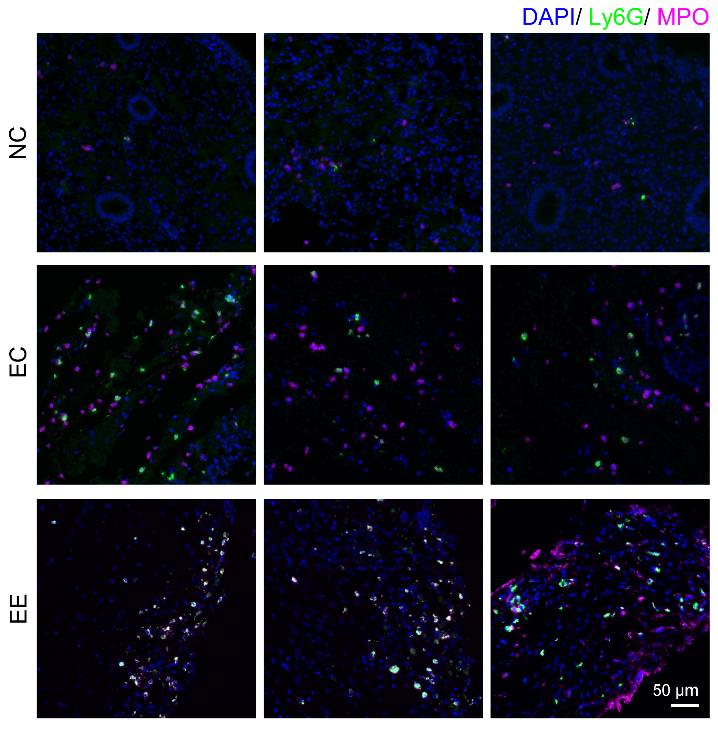


**Supplementary.Figure.10** Representative fluorescence images of the endometrium (n=3) with MPO (violet), Ly6G (green), and DAPI (blue) (bar = 50 μm).


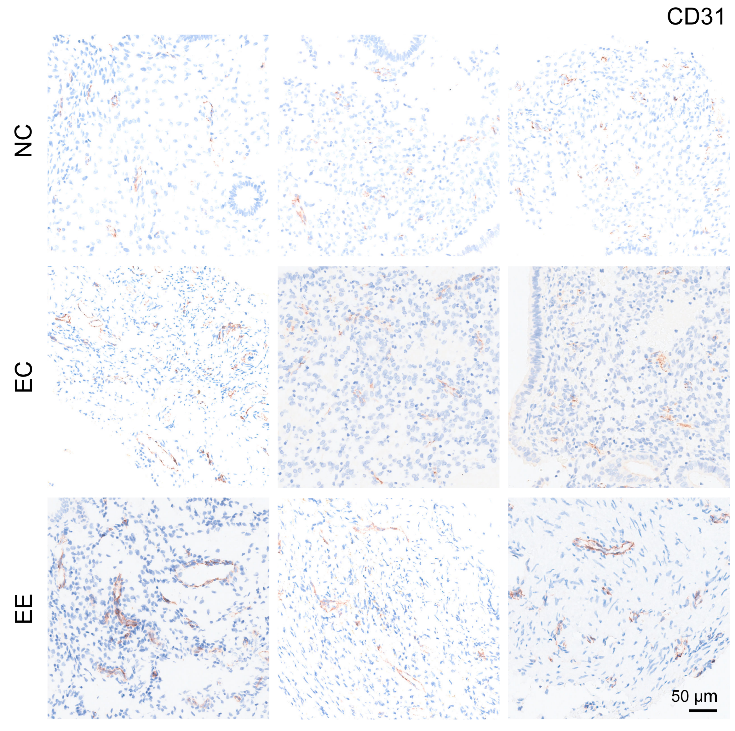


**Supplementary.Figure.11** Representative white-light images of the endometrium (n=3) with CD31 (bar = 50 μm).


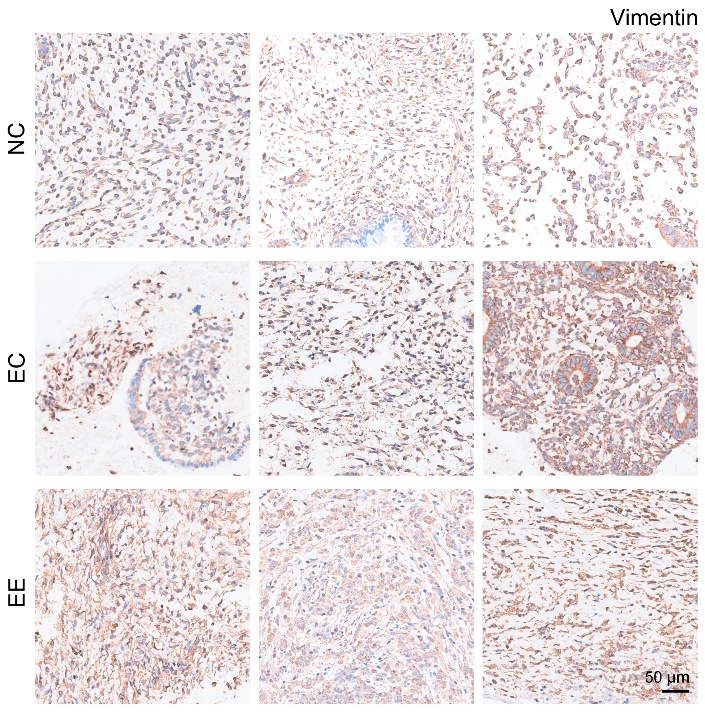


**Supplementary.Figure.12** Representative white-light images of the endometrium (n=3) with vimentin (bar = 50 μm).


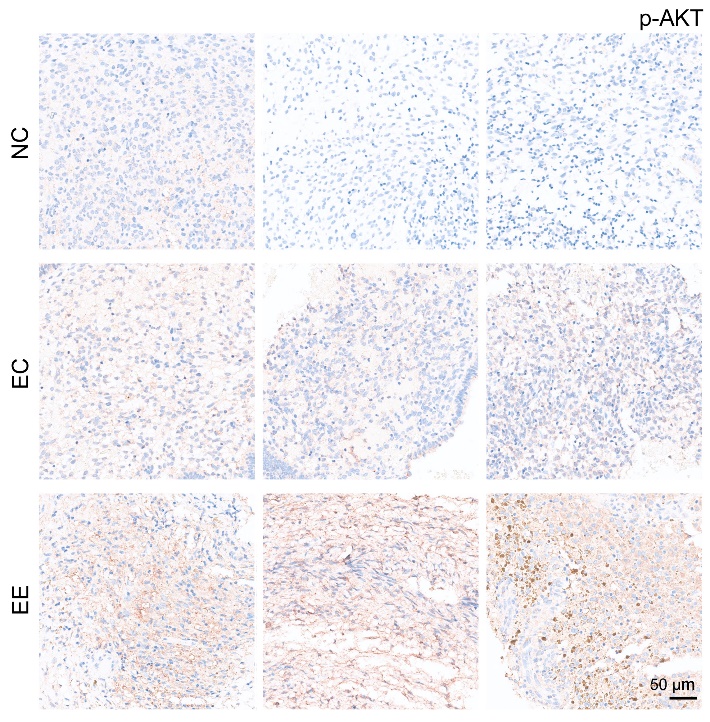


**Supplementary.Figure.13** Representative white-light images of the endometrium (n=3) with p-AKT (bar = 50 μm).


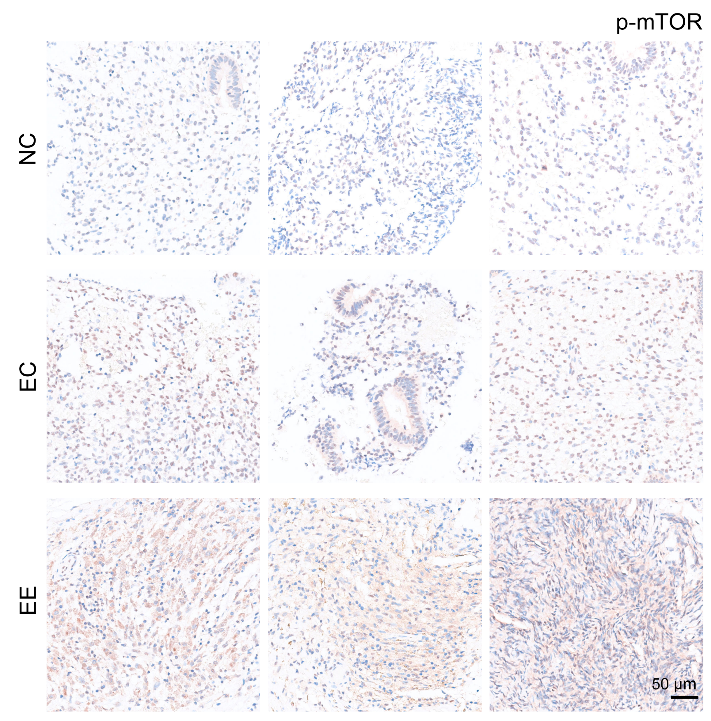


**Supplementary.Figure.14** Representative white-light images of the endometrium (n=3) with p-mTPR (bar = 50 μm).
